# Supplementary material for: An Antimicrobial and Antifibrotic Coating for Implantable Biosensors
Source: MDPI journal article supplement (doi:10.3390/bios15030171), 2025-03-06
Supplement: s1 [file s1]

## Supplementary

### 1.1 Fabrication of gold electrode chips

The gold electrode chips consist of 6 planar electrodes - 4 working electrodes, a common counter and reference electrode, all fabricated on glass substrates with a form factor of ~1x2cm. The cell for electrochemical measurements is created by placing a sample well beneath a custom laser-cut double-sided adhesive tape, and it only requires about 15  $\mu$ L to cover all the electrodes. The individual working electrodes can be separately functionalized with specific capture probe enabling multiplexed detection using a sample volume as low as 15  $\mu$ L. The reproducibility of coatings has been previously measured using the antifouling composition (BSA/prGOx/GTA) as described in our past publications.

### 1.2 Antimicrobial efficacy and leaching

To assess potential antibiotic leaching from the nanocomposite, we assessed chips with three nanocomposite coatings: 1.) without antibiotics (prGOx/BSA/GNP), 2.) with antibiotics containing a primary amine-containing functional group (prGOx/BSA/GNP/G), and 3.) an antibiotic with no primary amine groups (meropenem, prGOx/BSA/GNP/M). Initially, two pieces of double-sided tape were placed to create a well in which LB medium and bacterial suspension could remain in contact with the nanocomposite coating. Then 40  $\mu$ L of  $\sim 10^2$  CFU /mL *P. aeruginosa* in LB medium was added to the nanocomposite and incubated in a humidity chamber for 24 h on a shaker at 70 rpm and 37 °C. The following day, the remaining inoculum was collected and the nanocomposite was washed with 60  $\mu$ L LB medium, serially diluted, plated, and counted after 24 h incubation at 37 °C. This procedure was then repeated daily for two consecutive days. Collected media was added to a 5mm piece of  $\phi$  filter paper (Thermo Fisher Scientific) placed on an LB agar plate which had been swabbed with *P. aeruginosa* in LB medium to create a bacterial lawn. As a control, a separate plate was swabbed and 1  $\mu$ L of 70 mg mL<sup>-1</sup> G was diluted at 1:20 in LB medium, 2-fold serially diluted, and added to 5 mm pieces of  $\phi$  filter paper on the bacterial lawn. Plates were then incubated for 24 h at 37 °C whereafter the zones of inhibition around the filter papers were analyzed.

## Figures

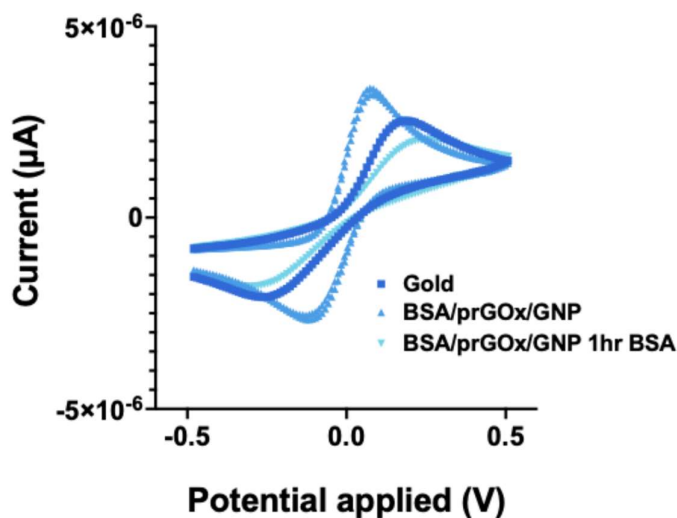

Figure S1. BSA/prGOx/GNP coating current densities measured by cyclic voltammetry (CV) compared to uncoated control (gold) and after 1 hr incubation with BSA (n=2).

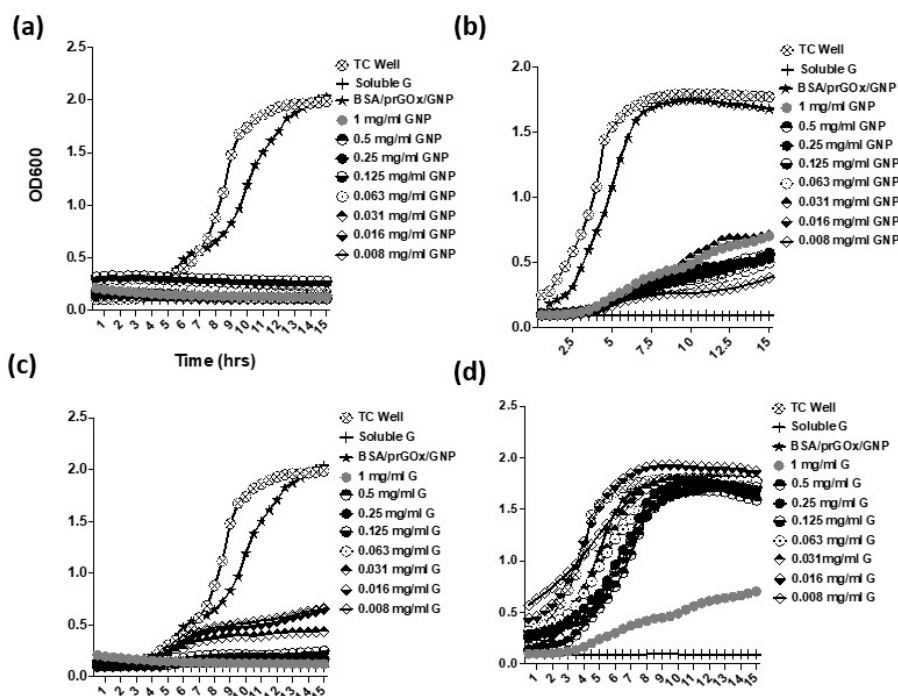

Figure S2. Antimicrobial efficacy of BSA/prGOx/GNP/G coatings with varied antibiotic (G) (a and b) and crosslinker (GNP) (c and d) concentrations measured by a micro broth assay using  $10^6$  CFU/mL *P. aeruginosa* grown in LB medium over 15 h at 37 °C (a and c), then washed and grown again with fresh bacteria for 15 h (b and d) (n=3). A saturating dose of soluble gentamicin ( $100 \mu\text{g mL}^{-1}$ ) was used as a positive control (Soluble G), and a blank tissue culture plate was used as a negative control (TC Well).

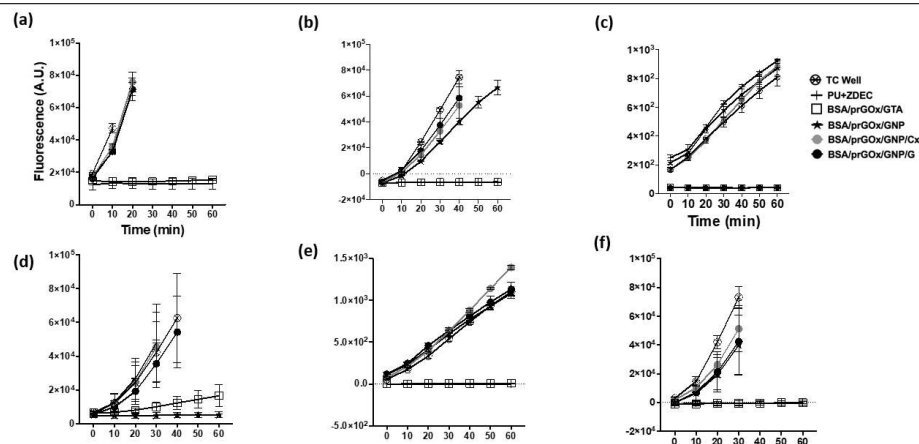

**Figure S3.** AlamarBlue assay run immediately on human-derived fibroblasts after 24 h and 48 h incubation with BSA/prGOx/GNP/Ab coatings (BSA/prGOx/GNP, BSA/prGOx/GNP/G, BSA/prGOx/GNP/Cx) and BSA/prGOx/GTA at 37 °C for 24h (a, b, c) and 48 h (d, e, f); background signal was removed before plotting. The negative control was a plasma-treated tissue culture plate well (TC Well), and the positive control was polyurethane (PU) film containing 0.1% zinc diethyl-dithiocarbamate (ZDEC) (PU+ZDEC).
